# Supplementary material
Source: Elsevier journal article supplement (https://www.sciencedirect.com/science/article/pii/S1885585718302019)
Supplement: mmc2 [file S1885585718302019:mmc2.pdf]

## **SUPPLEMENTARY MATERIAL**

**Video of the supplementary material.** VesselNavigator-assisted aortic arch stent implantation in a 12-year-old patient after surgical treatment of an interrupted aortic arch.
